1 **One Health, One Hive: A scoping review of honey bees, climate change,**  
2 **pollutants, and antimicrobial resistance**

3 Etienne J. de Jongh<sup>1,2,3</sup>, Sherilee L. Harper<sup>2</sup>, Shelby S. Yamamoto<sup>2</sup>, Carlee J. Wright<sup>2</sup>, Craig W.  
4 Wilkinson<sup>1</sup>, Soumyaditya Ghosh<sup>3</sup>, Simon J.G. Otto<sup>3\*</sup>

5  
6 <sup>1</sup> Department of Agricultural, Food and Nutritional Science, Faculty of Agriculture, Life, and  
7 Environmental Sciences, University of Alberta, Edmonton, Canada

8 <sup>2</sup> School of Public Health, University of Alberta, Edmonton, Canada

9 <sup>3</sup> HEAT-AMR (Human-Environment-Animal Transdisciplinary Antimicrobial Resistance)  
10 Research Group, School of Public Health, University of Alberta

11

12 \* Corresponding Author

13 E-mail: [simon.otto@ualberta.ca](mailto:simon.otto@ualberta.ca) (SJGO)

14

15 **Author contributions:** please see entries at the end of the manuscript after acknowledgements.

16

17 **Short Title:** The One Health intersection of honey bees, climate change, pollutants, and  
18 antimicrobial resistance

19

20 **Key Words:** honey bees; *Apis mellifera*; antimicrobial resistance; climate change; environmental  
21 pollution or pollutants; One Health

22

## 23 **Abstract**

24 Anthropogenic climate change and increasing antimicrobial resistance (AMR) together  
25 threaten the last 50 years of public health gains. Honey bees are a model One Health organism to  
26 investigate interactions between climate change and AMR. The objective of this scoping review  
27 was to examine the range, extent, and nature of published literature on the relationship between  
28 AMR and honey bees in the context of climate change and environmental pollutants.

29 The review followed systematic search methods and reporting guidelines. A protocol was  
30 developed *a priori* in consultation with a research librarian. Resulting Boolean search strings  
31 were used to search Embase® via Ovid®, MEDLINE®, Scopus®, AGRICOLA™ and Web of  
32 Science™ databases. Two independent reviewers conducted two-stage screening on retrieved  
33 articles. To be included, the article had to examine honey bees, AMR, and either climate change  
34 or environmental pollution. Data, in accordance with Joanna Briggs Institute guidelines, were  
35 extracted from relevant articles and descriptively synthesized in tables, figures, and narrative  
36 form.

37 A total of 21 articles met the inclusion criteria, with almost half of all articles being  
38 published in the last five years (n=10). These articles predominantly investigated hive  
39 immunocompetence and multi-drug resistance transporter downregulation (n=10), susceptibility  
40 to pests (n=15), especially American foul brood (n=9), and hive product augmentation (n=3).

41 This review identified key themes and gaps in the literature, including the need for future  
42 interdisciplinary research to explore the link between AMR and environmental change evidence  
43 streams in honey bees. We identified three potential linkages between pollutive and climatic  
44 factors and risk of AMR. These interconnections reaffirm the necessity of a One Health  
45 framework to tackle global threats and investigate complex issues that extend beyond honey bee

46 research into the public health sector. It is integral that we view these “wicked” problems  
47 through an interdisciplinary lens to explore long-term strategies for change.

48

## 49 **Introduction**

50           The global rise of antimicrobial resistance (AMR) over the past 50 years presents  
51 troubling health projections for both the public health and environment sectors (22).  
52 Antimicrobial resistance has global consequences for human health, resulting in approximately  
53 700,000 deaths each year. By 2050, it is projected that the number of AMR-related deaths could  
54 rise to 10 million annually, with an estimated economic impact of \$100 trillion USD (23). Also  
55 at the forefront of global grand challenges lies climate change. The dire consequences of climate  
56 change have captured the focus and driven the collaboration of notable organizations such as  
57 NASA, the United Nations, and governments the world over (24–27).

58           Seeded into these critical contemporary issues are complex interactions that necessitate  
59 the conduct of interdisciplinary research (28,29). Reports such as the World Health Organization  
60 (WHO) Antimicrobial Resistance Global Report, three recent Special Reports published by the  
61 Intergovernmental Panel on Climate Change (IPCC), and the Lancet Commission on Pollution  
62 and Health provide detailed insights into AMR, climate change, and environmental quality,  
63 respectively (22,30–33). However, these reports neglect to substantially address these  
64 components through an interdisciplinary lens that links the three issues. Increasing  
65 communication between disciplines is not only helpful in understanding complex  
66 multidimensional problems, but is essential for implementing long-term solutions for mitigation  
67 (34,35).

68           While growing interest in areas such as One Health has helped bridge the topics of AMR,  
69 climate change, and environmental research, the majority of studies are still concerningly limited  
70 to the silo of each individual issue (22). One Health is described as an approach to global health

71 that focuses on linkages between the health of humans, animals, and the environment by  
72 improving intersectional communication and collaboration through research and policy (36).

73 Honey bees can serve as a model One Health organism to investigate the interactions  
74 between environmental change and AMR due to their inseparable symbiosis with the  
75 determinants of environmental health (37,38). For example, environmental pollutants in water,  
76 soil, and air can negatively impact honey bee and hive health through leeching into pollen and  
77 honey foodstuffs (39,40). Moreover, warming temperatures and other climatic factors related to  
78 climate change can increase the prevalence and spread of honey bee diseases and decrease the  
79 efficacy of antimicrobials in treating pests and pathogens (1,41,42). Drug efficacy is further  
80 challenged by years of liberal antibiotic use (20,42), contributing to an increase in multidrug  
81 resistant microorganisms. Apiaries globally are reporting greater colony losses than ever before  
82 (43,44). It is generally believed that complex interactions between multiple environmental,  
83 pathogenic, and climatic factors are responsible for the majority of these losses, which have  
84 come to be referred to under the umbrella term of “colony collapse disorder” (45,46).  
85 Interdisciplinary research into these interactions is therefore highly beneficial and inherently  
86 relevant to honey bee health.

87 How do environmental and climatic factors interact with each other to exacerbate AMR  
88 in honey bees? Given the limited evidence currently available, the objective of this scoping  
89 review was to examine the range, extent, and nature of published literature on the relationship  
90 between AMR and honey bees in the context of climate change and environmental pollutants  
91 through a One Health lens.

92

## 93 **Materials and methods**

## 94 Protocol and search strategy

95 The review followed systematic search methods outlined in the Joanna Briggs Institute  
 96 (JBI) Reviewer’s Manual and is reported according to the PRISMA Scoping Review reporting  
 97 guidelines (47–52). A time-stamped protocol was developed *a priori* in consultation with a  
 98 research librarian (S1 Protocol). The PRISMA-ScR checklist is provided in S2 Table.

99 A comprehensive search strategy was developed to identify articles that discussed AMR  
 100 in honey bees in the context of environmental or climatic factors. No search restrictions were  
 101 placed on language, publishing date, or geography. An example search string for Embase® via  
 102 Ovid® is shown in Table 1. The complete search strings (S3 Table) were used to search  
 103 Embase® via Ovid®, MEDLINE®, Scopus®, AGRICOLA™ and Web of Science™ databases  
 104 on July 10, 2019.

105 **Table 1. Search string used to search Embase® via Ovid® database for articles about**  
 106 **honey bees, antimicrobial resistance, and environmental and/or climatic factors.**

107

| Component        | Search Terms                                                                                                                                                                                                                                                                                                                                                                                                                                                                                                                                                                              |
|------------------|-------------------------------------------------------------------------------------------------------------------------------------------------------------------------------------------------------------------------------------------------------------------------------------------------------------------------------------------------------------------------------------------------------------------------------------------------------------------------------------------------------------------------------------------------------------------------------------------|
| Honey Bees       | (bee OR bees OR honey?bee* OR honeybee* OR honey OR beekeep* OR apiar* OR arvicide* OR apis mellifera OR apidae OR (hive AND (health OR success OR collapse OR product* OR stability)))                                                                                                                                                                                                                                                                                                                                                                                                   |
| AND              |                                                                                                                                                                                                                                                                                                                                                                                                                                                                                                                                                                                           |
| AMR              | ((resistan* OR stewardship) AND (antibiotic* OR antimicrobial* OR anti-microbial* OR anti-bacterial* OR antibacterial* OR anti?viral* OR antiviral* OR anti?fungal* OR antifungal* OR anti?helminthic* OR antihelminthic* OR anthelmintic* OR anti?parasitic* OR antiparasitic* OR parasiticide* OR biocid* OR antiseptic* OR disinfectant* OR sterilant* OR sterili?er* OR chemosterilant* OR multidrug OR multi?drug)) OR AMR OR XDR OR TDR OR super?bug* OR superbug*)                                                                                                                 |
| AND              |                                                                                                                                                                                                                                                                                                                                                                                                                                                                                                                                                                                           |
| Climatic Factors | ((climat* adj15 (chang* OR model?ing OR predict* OR resilience OR sensitivity)) OR (environment* adj15 chang*) OR climate variability OR climatic variability OR global warm* OR greenhouse effect OR climate disaster OR (storm NOT (electrical OR autonomic OR thyroid*)) OR wind OR atmospheric pressure OR season* OR precipitation OR snow* OR ice OR humid* OR rain* OR flood OR drought OR wildfire* OR (heat adj15 (wave* OR extreme* OR event)) OR temperature* OR cool OR cold OR weather OR ultraviolet radiation OR UV OR El Nino-Southern Oscillation OR El Nino OR La Nina) |

OR

**Environmental  
Factors**

(air pollut\* OR persistent organic pollut\* OR particulate matter OR atmospheric contamin\* OR atmospheric pollut\* OR volatile organic compound\* OR volatile organic pollutant OR VOC OR VOCS OR ambient air pollution OR household air pollution OR criteria air pollutant\* OR biological air pollutant\* OR physical pollutant\* OR chemical pollutant\* OR gases OR ((fossil fuel OR 7arvicid\*) AND pollut\*) OR ((air OR water\* OR soil) AND (contamin\* OR toxic\* OR environment\* health OR quality OR disease\* OR particulate\* OR metal OR metals OR lead OR lead?II\* OR Pb OR pb?+ OR zinc\* OR Zn OR Zn?+ OR silver\* OR Ag OR Ag+ OR copper\* OR Cu OR Cu?+ OR Gallium\* OR Ga OR Ga?+ OR cobalt\* OR Co OR Co?+ OR Mercury\* OR Hg OR Hg?+ OR Arsenic\* OR As OR As?+ OR Nickel\* OR Ni OR Ni?+ OR vehicle\* OR automobile\* OR exhaust OR motorway\* OR roadway\* OR highway\* OR freeway\* OR road\* OR traffic OR urban OR Nox OR nitrogen oxides OR ozone OR particle\*)) OR dust OR dusts OR PM?2?5 OR PM?10 OR ultrafine particle\* OR polycyclic aromatic hydrocarbon\* OR PAH OR POPS OR smog OR water pollut\* OR (water\* AND (potable OR healthy OR drink\* OR safe OR suitab\* OR palatable OR edible OR tap OR fresh OR supply OR microbial contamina\*)) OR waterborne OR water?borne OR aquifer OR groundwater OR pesticid\* OR herbicid\* OR insecticid\* OR acaricid\* OR fungicid\* OR molluscacid\* OR larvicid\* OR fumigant OR anti?fouling agent\* OR agricultural chemical\* OR agrochemical\* OR (defoliant\* AND (chemical\* OR agent\*)) OR (hazardous AND substance\*) OR (toxic AND action\*) OR chemically?induced disorder\* OR furfural OR aculeximycin OR aluminum phosphide OR chromated copper arsenate OR CCA OR creosote)

108

109 After downloading all retrieved articles within Mendeley© (Elsevier, Amsterdam,  
110 Netherlands), articles were collated and de-duplicated in DistillerSR® (Evidence Partners,  
111 Ottawa, ON, Canada) and screened for eligibility via a two-stage screening process by two  
112 independent reviewers. Article titles, abstracts, and key words were screened in the first stage,  
113 followed by full-text screening in the second stage. To be included, the article had to examine  
114 honey bees, AMR, and either climate change or environmental pollution (S4 Screening Criteria).  
115 Antimicrobial resistance was defined as the ability of a pathogen to resist or reduce the effects of  
116 a drug or treatment meant to adversely affect its normal function (53). Environmental change  
117 variables were defined as changes in climate due to natural or anthropogenic causes (climate  
118 change), or as an increase in organic or inorganic contaminants of soil, air, or water that alters  
119 their natural role or effect in honey bee colonies (environmental pollutants) (54). Articles about  
120 season, weather, climate, and climate hazards in the context of climate change were also  
121 included. Honey bees were defined within the taxum *Apis mellifera* due to their agricultural

122 importance, though articles using the terms “bees” or “honey bees” were considered relevant if  
123 no taxum was mentioned. The initial protocol required articles to include honey bees, AMR,  
124 climate change, and environmental pollutants. However, after screening articles to the data  
125 extraction level, a lack of articles containing all components prompted a revision of our inclusion  
126 criteria. This second round of screening included articles that studied honey bees, AMR and at  
127 least one of either climate change or environmental pollutants. This amendment was reflected  
128 within the protocol, which was re-time-stamped on December 9, 2019. The amendment was  
129 deemed necessary to provide sufficient evidence for discussion, to allow for better identification  
130 of gaps in literature, and to provide a more meaningful project outcome as a result. Articles were  
131 excluded if they were books, book chapters, theses, dissertations, or commentaries. Conflicts  
132 between reviewers were resolved via discussion if necessary.

### 133 **Data charting process and data items**

134 Data regarding authorship, publication date, location of study, type of antimicrobial and  
135 target microbe, environmental and/or climatic factor assessed, research study design type,  
136 associated organizations, and outcomes of interest were extracted from relevant articles by two  
137 reviewers using DistillerSR®. Article information was exported to a pre-developed data  
138 extraction form within Excel® (Microsoft, Redmond, WA) for analysis (S5 Data Extraction).  
139 Articles were partitioned into thematic categories for further exploration, including:  
140 immunocompetence and multi-drug resistance (MDR) transporter downregulation, susceptibility  
141 to pests, and in-hive products.

142 Results were synthesized in tables, graphs, and narrative to present the comprehensive  
143 scope of current research in a concise and effective manner. Tables and figures present key



144 findings in the results, while supplementary materials provide comprehensive results from the  
145 study to allow for replication in future research.

146

## 147 **Results**

148 The initial search recovered 1,402 articles, with 1,146 remaining after deduplication (Figure 1).  
149 First-stage screening excluded 1,018 articles; 128 articles were eligible for second-stage, full-text  
150 screening, which reduced this number to 21. The majority of articles were excluded in this stage  
151 due to lacking mention of environmental variables or antibiotic resistance (n=42), and failure to  
152 frame these topics in the context of honey bee health (n=28). Additionally, we were unable to  
153 locate full-text pdfs for 37 articles (S6 Excluded Articles).

154

155 **Figure 1. PRISMA-ScR flow diagram of study selection process for the systematic scoping**  
156 **review of the impacts of climate change, environmental pollution, and antimicrobial**  
157 **resistance on honey bee health.**

158

## 159 **Characteristics of sources of evidence**

160 Twenty-one articles met the inclusion criteria and were included in our analysis. An  
161 overview of these articles is included in Table 2, while a complete listing of included articles and  
162 study characteristics is available in S5 Data Extraction. Articles were published between 1993  
163 and 2019. Research on AMR and effects of environmental change in honey bees steadily  
164 increased in recent years with almost half (n=10) of included articles published in the last five  
165 years alone (2014-2019) (Figure 2).

166 **Table 2. Summary of article characteristics captured by this study and deemed eligible for review.**

| Reference number | Author(s)               | Year | Location                 | Hive/honey bee health aspects of concern                       | Antimicrobial                                                                                                                                          | Target microbe                                                                               | Climate variable of interest                            | Environmental quality factor of interest                                                                                                                                                                                                                                                                                                               |
|------------------|-------------------------|------|--------------------------|----------------------------------------------------------------|--------------------------------------------------------------------------------------------------------------------------------------------------------|----------------------------------------------------------------------------------------------|---------------------------------------------------------|--------------------------------------------------------------------------------------------------------------------------------------------------------------------------------------------------------------------------------------------------------------------------------------------------------------------------------------------------------|
| (1)              | Regueira Neto et al.    | 2017 | Tamandare, Brazil        | Immunocompetence, self treatment                               | Red propolis, gentamicin, imipenem                                                                                                                     | <i>Escherichia coli</i> ,<br><i>Pseudomonas aeruginosa</i> ,<br><i>Staphylococcus aureus</i> | Precipitation, Seasonal variability (Wet vs Dry season) | --                                                                                                                                                                                                                                                                                                                                                     |
| (2)              | Ueno et al.             | 2018 | 17 prefectures in Japan  | American Foulbrood                                             | Mirosamicin, Oxytetracycline, Tylosin, Lincomycin, chloramphenicol, streptomycin, erythromycin                                                         | <i>Paenibacillus larvae</i>                                                                  | Geography/general variations in climate                 | --                                                                                                                                                                                                                                                                                                                                                     |
| (3)              | Ebrahimi, and Lotfalian | 2005 | Shahrekord, Central Iran | Honey bee dysbiosis                                            | Gentamicin, Streptomycin, Kanamycin, Amikacin Penicillin Chloramphenicol, Nalidixic Acid, Oxytetracyclin, Erythromycin, Vancomycin, and Nitrofurantoin | <i>Escherichia coli</i> ,<br><i>Staphylococcus aureus</i>                                    | Temperature, seasonal variability (Spring vs Fall)      | --                                                                                                                                                                                                                                                                                                                                                     |
| (4)              | James and Xu            | 2011 | Not Stated/ Global       | Immunocompetence, antimicrobial peptides, behavioural immunity | Antimicrobial peptides, reactive oxygen species, RNA interference                                                                                      | Bacteria, virus, fungi, parasites                                                            | --                                                      | Environmental pesticides, botanical insecticides (Acacia senega extract/Artemisia annua extract/Azadirachtin/Quercetin/Terpinen-4-ol), inorganic insecticides (Sodium tetraborate), insect growth regulators (Buprofezin/Fenoxycarb/Flufenoxuron/Pyriproxyfen), neonicotinoids (Imidacloprid), organochlorines (Endosulfan/Dieldrin), organophosphates |

|      |                            |      |                   |                                                                                                       |                                                                                                         |                                                                                                                                                         |                                         |                                                                                         |
|------|----------------------------|------|-------------------|-------------------------------------------------------------------------------------------------------|---------------------------------------------------------------------------------------------------------|---------------------------------------------------------------------------------------------------------------------------------------------------------|-----------------------------------------|-----------------------------------------------------------------------------------------|
|      |                            |      |                   |                                                                                                       |                                                                                                         |                                                                                                                                                         |                                         | (Dimethoate/Malathion/Quinalphos)                                                       |
| (5)  | Travis et al.              | 2014 | Not Stated/Global | General honey bee morbidity related to increasing agricultural, such as pesticide use and monoculture | General/not stated                                                                                      | General/not stated                                                                                                                                      | --                                      | General Insecticide and pesticide use associated with intensive agriculture             |
| (6)  | Bernal et al.              | 2011 | Marchamalo, Spain | American Foulbrood                                                                                    | Tylosins A, B, C, D                                                                                     | <i>Paenibacillus</i> larvae                                                                                                                             | Temperature, light                      | --                                                                                      |
| (7)  | Hawthorne et al.           | 2011 | United States     | American Foulbrood, Varroa mite, Multidrug resistance transporters                                    | Coumaphos, t-fluvalinate, oxytetracycline                                                               | <i>Paenibacillus</i> larvae, varroa mite                                                                                                                | --                                      | Environmental insecticides, neonicotinoids (imidacloprid, acetamiprid, and thiacloprid) |
| (8)  | Guseman et al.             | 2016 | United States     | Nosema, Multidrug resistance transporters                                                             | Verapamil, pristine, fumagillin, quercetin                                                              | <i>Nosema</i> sp.                                                                                                                                       | --                                      | Environmental ivermectin and ivermectin-like pesticides, neonicotinoids                 |
| (9)  | Brandt et al.              | 2016 | Germany           | Immunocompetence                                                                                      | Honey bee hemolymph                                                                                     | General/not stated                                                                                                                                      | --                                      | Environmental neonicotinoids (thiacloprid, imidacloprid, and clothianidin)              |
| (10) | Brandt et al.              | 2017 | Germany           | Immunocompetence                                                                                      | Honey bee hemolymph                                                                                     | General                                                                                                                                                 | --                                      | Environmental neonicotinoids                                                            |
| (11) | O'Neal et al.              | 2019 | United States     | Immunocompetence, social immunity                                                                     | Innate antimicrobials                                                                                   | Viruses                                                                                                                                                 | --                                      | Environmental fungicides (chlorothalonil)                                               |
| (12) | Prodelalová et al.         | 2017 | Czech Republic    | General viral infection                                                                               | Peracetic acid, iodophors                                                                               | <i>Paenibacillus</i> larvae, deformed wing virus, Sacbrood virus, and slow bee paralysis virus, black queen cell virus, acute paralysis complex viruses | Temperature                             | --                                                                                      |
| (13) | Ozkirim, Aktas, and Keskin | 2007 | Turkey            | American Foulbrood                                                                                    | Sulbactam ampicillin, amoxicillin clavunolic acid, tobramycin, erythromycin, azithromycin, and rifampin | <i>Paenibacillus</i> Larvae                                                                                                                             | Geography/general variations in climate | --                                                                                      |

|      |                  |      |                   |                                                                                                                         |                                                                           |                                                                                                                                                                                                                                                                                                                                                                                                                        |                                                                         |                                                                                                                                            |
|------|------------------|------|-------------------|-------------------------------------------------------------------------------------------------------------------------|---------------------------------------------------------------------------|------------------------------------------------------------------------------------------------------------------------------------------------------------------------------------------------------------------------------------------------------------------------------------------------------------------------------------------------------------------------------------------------------------------------|-------------------------------------------------------------------------|--------------------------------------------------------------------------------------------------------------------------------------------|
| (14) | Alippi et al;    | 2005 | Not Stated/Global | American Foulbrood                                                                                                      | Tylosin                                                                   | <i>Paenibacillus</i> larvae, <i>Pseudomonas aeruginosa</i> , <i>Escherichia coli</i> , <i>Staphylococcus aureus</i>                                                                                                                                                                                                                                                                                                    | Geography/general variations in climate                                 | --                                                                                                                                         |
| (15) | Erler and Moritz | 2015 | Not Stated/Global | American Foulbrood, European Foulbrood, varroa mite, deformed wing virus immunocompetence, chalkbrood, self medication. | Beeswax, bee food jelly including royal jelly, bee venom, resin, propolis | <i>Enterococcus faecalis</i> , <i>Paenibacillus</i> larvae, acute bee paralysis virus, black queen cell virus, deformed wing virus, sacbrood virus, <i>Paenibacillus alvei</i> , <i>Galleria mellonella</i> , <i>Apis flavus</i> , <i>Aspergillus fumigatus</i> , <i>Aspergillus niger</i> , <i>Nosema apis</i> , <i>Nosema ceranae</i> , <i>Aethina tumida</i> , <i>Oecophylla smaragdina</i> , insects, dead mammals | Temperature, precipitation, climate type                                | --                                                                                                                                         |
| (16) | Chaimanee et al. | 2013 | Thailand          | Nosema                                                                                                                  | Immunocompetence, Antimicrobial peptides                                  | <i>Nosema ceranae</i> from Canada and Thailand                                                                                                                                                                                                                                                                                                                                                                         | Geography/general variations in climate                                 | --                                                                                                                                         |
| (17) | Bastos et al.    | 2007 | Brazil            | American Foulbrood                                                                                                      | Propolis, Vancomycin, Tetracycline, Tylosin                               | <i>Paenibacillus</i> larvae                                                                                                                                                                                                                                                                                                                                                                                            | Indirect, general climate affecting hive product antimicrobial strength | --                                                                                                                                         |
| (18) | Krongdang et al. | 2017 | United States     | American Foulbrood                                                                                                      | Oxytetracycline, tetracycline, tylosin, lincomycin                        | <i>Paenibacillus</i> larvae                                                                                                                                                                                                                                                                                                                                                                                            | Geography/general variations in climate                                 | --                                                                                                                                         |
| (19) | Gregorc et al.   | 2012 | United States     | Varroa mite, immunocompetence                                                                                           | Antimicrobial peptides (abaecin, hymenoptaecin, defensin1)                | Deformed Wing Virus                                                                                                                                                                                                                                                                                                                                                                                                    | --                                                                      | Environmental pesticides (chlorpyrifos, imidacloprid, amitraz, fluvalinate, coumaphos, myclobutanil, chlorothalonil, glyphosate, simazine) |
| (20) | Tian et al.      | 2012 | United States     | American Foulbrood, European                                                                                            | Oxytetracycline                                                           | <i>Melissococcus pluton</i> , <i>Paenibacillus</i> larvae                                                                                                                                                                                                                                                                                                                                                              | Geography/general variations in climate                                 | Environmental broad spectrum antimicrobial exposure                                                                                        |

|      |        |      |       |                             |             |             |                                                                           |    |
|------|--------|------|-------|-----------------------------|-------------|-------------|---------------------------------------------------------------------------|----|
|      |        |      |       | Foulbrood, gut<br>dysbiosis |             |             |                                                                           |    |
| (21) | Loglio | 1993 | Italy | Varroa mite                 | Fluvalinate | Varroa mite | Temperature, seasonal<br>variability, sunlight, altitude,<br>climate type | -- |

167

168 **Figure 2. Timeline of study publication dates for articles on honey bee health, antimicrobial**  
169 **resistance, climate change, and environmental pollution. Articles are organized by year of**  
170 **publication and represented in quantity by the length of the pin above each respective year.**  
171 **The number of articles per year is included inside each pinhead. \*Note 2019 was an**  
172 **incomplete year because the article search was conducted in July 2019.**

173

174 Figure 3 shows the study location in a global context. Article publication represented  
175 research from ten countries that was distributed globally. While some articles did not specify a  
176 geographical origin (n=4), the majority of publications occurred in high income nations (n=12;  
177 Czech Republic, Germany, Italy, Japan, Spain, United States) (55). The United States constituted  
178 the largest proportion of location specific publications (n=6). A large proportion of articles also  
179 came from Europe, with a total of six articles spread over four European countries (Germany,  
180 n=2; Czech Republic, n=1; Spain, n=1; Turkey, n=1; Italy, n=1).

181

182 **Figure 3. The global distribution of the study locations included in the review presented as**  
183 **the number of studies by country with article numbers represented by the relative circle**  
184 **size.**

185

186 Out of the 21 articles, 62% (n=13) followed an experimental study design, with the rest  
187 being observational or descriptive studies. There were relatively few studies with broader scope  
188 that investigated AMR and environmental change from a global or ecological perspective.

189

## 190 **Synthesis of results**

191 Table 3 summarizes environmental factors of interest by climatic or pollutive basis.  
192 Environmental factors of interest varied greatly, with environmental insecticides being the most  
193 common pollutive factors (n=6) and indirect geographical differences (different climate zones as  
194 a result of different geographical locations) accounting for the majority of climatic factors (n=6).  
195 Although most articles revealed potential indirect links to AMR in honey bees, few articles  
196 directly linked specific pollutive variables to AMR, the most common of which was the effect of  
197 neonicotinoids (n=5).

**Table 3. Summary of environmental factors of change in the included articles.**

| Article Environmental Factor of Change | # of relevant articles | Author(s) and year                                                                                                                                          |
|----------------------------------------|------------------------|-------------------------------------------------------------------------------------------------------------------------------------------------------------|
| <b>Climatic Factors</b>                |                        |                                                                                                                                                             |
| Season                                 | 3                      | Loglio (1993); Ebrahimi and Lotfalian (2005); Regueira Neto, et al. (2017)                                                                                  |
| Geography                              | 6                      | Alippi et al. (2005); Ozkirim, A., Aktas, S., & Keskin, N. (2007); Tian et al. (2012); Chaimanee et al. (2013); Krongdang et al. (2017); Ueno et al. (2018) |
| Temperature                            | 3                      | Loglio (1993); Ebrahimi and Lotfalian (2005); Bernal et al. (2011); Erler and Moritz (2016); Prodelalová et al. (2017)                                      |
| Sunlight                               | 2                      | Loglio (1993); Bernal et al. (2011)                                                                                                                         |
| Precipitation                          | 2                      | Erler and Moritz (2016); Regueira Neto, et al. (2017)                                                                                                       |
| General/Climate type                   | 3                      | Loglio (1993); Bastos et al. (2008); Erler and Moritz (2016)                                                                                                |
| <b>Pollutive Factors</b>               |                        |                                                                                                                                                             |

|               |   |                                                                                                                                           |
|---------------|---|-------------------------------------------------------------------------------------------------------------------------------------------|
| Pesticides    | 4 | Gregorc et al. (2012); James and Xu (2012); Travis et al. (2014); Guseman et al. (2016)                                                   |
| Insecticides  | 6 | Hawthorne and Dively (2011); James and Xu (2012); Travis et al. (2014); Brandt et al. (2016); Guseman et al. (2016); Brandt et al. (2017) |
| Fungicides    | 1 | O’Neal et al. (2019)                                                                                                                      |
| Other/General | 2 | Tian et al. (2012); Travis et al. (2014)                                                                                                  |

198

199

200 The 21 articles can be broadly divided into three thematic categories based on the focus of  
 201 the study and linkage of AMR to environmental factors: 1) immunocompetence and MDR  
 202 transporter downregulation; 2) interactions with pest susceptibility; and 3) influences on in-hive  
 203 antimicrobial properties (categorization shown in Table 4).

**Table 4. Summary of article characteristics by thematic category.**

| Article General Topic of Interest                                          | # of relevant articles | Author(s) and Year                                                                                                                                                                           |
|----------------------------------------------------------------------------|------------------------|----------------------------------------------------------------------------------------------------------------------------------------------------------------------------------------------|
| Immunocompetence and multidrug resistance (MDR) transporter downregulation |                        |                                                                                                                                                                                              |
| Immunocompetence                                                           | 8                      | Gregorc et al. (2012); James and Xu (2012); Chaimanee et al. (2013); Brandt et al. (2016); Erler and Moritz (2016); Brandt et al. (2017); Regueira Neto, et al. (2017); O’Neal et al. (2019) |
| MDR transporter downregulation                                             | 2                      | Hawthorne and Dively (2011); Guseman et al. (2016)                                                                                                                                           |



|                                |                                                       |    |                                                                                                                                                                                                                                                  |
|--------------------------------|-------------------------------------------------------|----|--------------------------------------------------------------------------------------------------------------------------------------------------------------------------------------------------------------------------------------------------|
| Increased morbidity            |                                                       | 10 | Hawthorne and Dively (2011); Gregorc et al. (2012); James and Xu (2012); Chaimanee et al. (2013); Brandt et al. (2016); Erler and Moritz (2016); Guseman et al. (2016); Brandt et al. (2017); Regueira Neto, et al. (2017); O’Neal et al. (2019) |
| Increased Transmission         |                                                       | 1  | James and Xu (2012)                                                                                                                                                                                                                              |
| <b>Susceptibility to pests</b> |                                                       |    |                                                                                                                                                                                                                                                  |
| Parasites                      | Varroa Mite                                           | 4  | Loglio (1993); Hawthorne and Dively (2011); Gregorc et al. (2012); Erler and Moritz (2016)                                                                                                                                                       |
| Fungi                          | <i>Nosema</i>                                         | 2  | Chaimanee et al. (2013); Guseman et al. (2016)                                                                                                                                                                                                   |
|                                | Chalkbrood ( <i>Ascosphaera apis</i> )                | 1  | Erler and Moritz (2016)                                                                                                                                                                                                                          |
|                                | General                                               | 1  | James and Xu (2012)                                                                                                                                                                                                                              |
| Bacteria                       | American foulbrood ( <i>Paenibacillus larvae</i> )    | 9  | Alippi et al. (2005); Ozkirim, A., Aktas, S., & Keskin, N. (2007); Bastos et al. (2008); Bernal et al. (2011); Hawthorne and Dively (2011); Tian et al. (2012); Erler and Moritz (2016); Krongdang et al. (2017); Ueno et al. (2018)             |
|                                | European foulbrood ( <i>Melissococcus plutonius</i> ) | 2  | Tian et al. (2012); Erler and Moritz (2016)                                                                                                                                                                                                      |
| Viruses                        |                                                       | 3  | Gregorc et al. (2012); James and Xu (2012); O’Neal et al. (2019)                                                                                                                                                                                 |
| <b>Hive Products</b>           |                                                       |    |                                                                                                                                                                                                                                                  |
|                                | Brazilian Red Propolis                                | 3  | Bastos et al. (2008); Erler and Moritz (2016); Regueira Neto, et al. (2017)                                                                                                                                                                      |
|                                | Other/General                                         | 1  | Erler and Moritz (2016)                                                                                                                                                                                                                          |

204

205

206 **Immunocompetence and MDR transporter downregulation**

207           Of these 21 articles, eight focused on immunocompetence (1,4,9–11,15,16,19) and two  
208 investigated the downregulation of MDR transporters (7,8). These ten articles studied the  
209 synergistic effects of pesticides and climatic factors on honey bee innate immunity inhibition.  
210 They found correlations between exposure to antibiotics or pathogens and decreasing honey bee  
211 immune function. One article also noted that dual exposure of pathogens and pesticides may  
212 increase transmission of disease (4). Most articles focused on alterations in honey bee  
213 immunocompetence resulting from the inhibition of immune-essential endogenous microbiota  
214 within the gastrointestinal tract (1,4,9–11,15,16,19). These articles described defensive reactions  
215 on the part of the biota (e.g. drug efflux, gene expression) to pollutants and environmental  
216 contaminants, as well as inhibition of these defensive mechanisms. Several articles explored  
217 alteration of MDR transporters, which are natural efflux pumps present in the cells of almost all  
218 animal species (7,8). They pump many different classes of harmful compounds out of the cell,  
219 such as heavy metals, pesticides, and in some cases, antimicrobials (56). Exposure to one of  
220 these compounds can trigger an upregulation of MDR efflux pump expression, thereby  
221 increasing resistance to multiple other types of compounds without direct exposure. In this way,  
222 MDR transporters can have substantial impact of the efficacy of drug dosages (8). No article  
223 extrapolated this effect to the development of AMR.

## 224 **Susceptibility to pests**

225           Most studies investigated bacterial infections, with almost half of all articles focusing on  
226 *Paenibacillus larvae*, the causative agent of American foulbrood (n=9) (2,6,7,13–15,17,18,20).  
227 *Melissococcus plutonius*, the causative agent of European foulbrood, was also investigated in  
228 two articles (15,20). The parasitic mite *Varroa destructor* (n=4) (7,15,19,21) and the fungal  
229 genus *Nosema* (n=2) (8,16) received some marginal exploration. These articles linked increased

230 pollutants to reduced honey bee health in the form of antimicrobial peptide (AMP) expression  
231 modulation. Antimicrobial peptides are critical to insect immune defense, and by altering their  
232 transcription or expression, environmental pollutants may lead to increased infection and  
233 transmission of pests and pathogens (4). Articles largely neglected to evaluate how this increase  
234 in disease may necessitate the need for increased drug treatment in the hive and to the  
235 development of AMR. Articles that predominantly focused on *V. destructor* infection also  
236 investigated morbidity as a result of deformed wing virus infection due to the strong association  
237 between these two pathogens (57).

### 238 **In-hive products**

239         The third thematic category explored by this study was the self administration of in-hive  
240 antimicrobial products on AMR. Three articles were included on this topic, all of which  
241 discussed the effect of the hive product propolis, an antibiotic and sealant made by the honey  
242 bees from resinous plant products, beeswax, and salivary enzymes (1,15,17). Two of the three  
243 articles focused exclusively on the use of propolis (1,17), while one also investigated all natural,  
244 pharmaceutically active compounds made and used by honey bees in the hive (15). In regards to  
245 climatic variables, one article investigated seasonality and another investigated geographical  
246 origin as factors that impact the efficacy of propolis (1,17). Together, these found that propolis  
247 was more inhibitory to bacteria, particularly *P. larvae*, when it was sourced from Brazil during  
248 the dry season. The remaining article looked how environmental factors influence self  
249 medicative behaviour among honey bees (15).

250

## 251 **Discussion**

252           This study synthesized current interdisciplinary research on AMR, climate change, and  
253 environmental pollution in honey bees through a One Health lens in order to characterize past  
254 studies and identify potential avenues for future research. The scoping review identified 21  
255 articles published between 1993 and 2019 that examined how interactions between climatic,  
256 pollutive, and microbial factors influenced honey bee health through AMR risk and  
257 development. Most of these studies were experimental, indicating that research in this area is  
258 largely empirical and topically isolated. In general, articles described linkages between  
259 environmental factors such as temperature or insecticide pollution and the ability of honey bees  
260 to resist or treat hive infection, either at the colony or individual bee level, or at the biological or  
261 behavioural level. However, broad research on the linkage between AMR, climate change, and  
262 environmental pollutants on honey bee health was generally lacking, indicating a future need for  
263 interdisciplinary research in this field.

264           Honey bee immunity is complex and dependent on both behavioural and biological  
265 factors outside of, and within, the honey bee. Our study identified an opportunity for further  
266 investigation of immunocompetence and MDR transporter regulation as a consequence of  
267 environmental determinants. The relationship between immune function and MDR transporter  
268 regulation is pertinent to the field of AMR for a number of potential reasons. Firstly, any  
269 resistance acquired by honey bee cells via MDR transport upregulation could possibly increase  
270 the risk of AMR in symbiotic microbes (58,59). Bacterial pathogens can acquire resistance genes  
271 through horizontal genetic transfer (HGT) (59). There is evidence that insects transfer genetic  
272 material bidirectionally through HGT with intracellular primary endosymbiont bacteria within  
273 polyploid bacteriocyte cells (60). Evidence of exchange of bacterial genes with fungal pathogens

274 by HGT further strengthens this possibility (61), but specific evidence of the transfer of AMR  
275 genes through these mechanisms remains largely unstudied.

276 Secondly, an upregulation in the activity of natural honey bee cell membrane transporters  
277 may decrease the intracellular concentration of antimicrobials, thereby increasing the resistance  
278 of intracellular organisms. With less antimicrobials circulating within the honey bee cells,  
279 intracellular pathogens such as *Nosema* spp. and pathogens that live within the body cavity such  
280 as *Ascospaera apis* may be exposed to lower dosages during this upregulation of membrane  
281 transporters (60,61). By “shading” potential pathogens from antimicrobial treatment, there  
282 presents an increased risk for AMR development by the microbes. A similar effect has been  
283 studied in the public health sector through the use of small colony variants of *Staphylococcus*  
284 *aureus*, whereby the microbe is theorized to shelter from antimicrobial treatment within host  
285 cells to increase resistance against treatment and allow recurring infections (62,63).

286 Lastly, with a decrease in honey bee immunity, pathogens are able to more quickly spread  
287 and develop inside the hive. Articles within our study primarily focused on immunity as a factor  
288 of honey bee endogenous microbiota, highlighting correlations between environmental pollutants  
289 and changes in microbiota function. These microbiota have been found to be exceptionally  
290 important both in honey bee pathogenic defence, as well as in recovery (64). Small changes in  
291 the immune function of the honey bee linked to changes in these microbes can have drastic  
292 effects on the ability of honey bees to fight off disease. However, the articles in this study failed  
293 to evaluate how an adjustment in immunity may correspond to an increased risk of AMR.  
294 Notably, human studies have shown that a compromised immune system increases the risk of  
295 AMR emergence (65,66). This can be due to inhibition of synergistic actions between the  
296 immune system and the antimicrobial in reaching an effective minimum inhibitory concentration

297 at the site of infection, an overall increase in disease prevalence, or a higher rate of mutation  
298 resulting from unhindered population growth. However, these connections are absent in the  
299 articles in this study, and therefore there remains the opportunity to address these connections in  
300 the future.

301 Our scoping review exposed correlations between environmental factors and an increased  
302 susceptibility of honey bees to disease. The predominant cause of vulnerability in the hive was  
303 due to modulation of AMPs by environmental pollutants. These peptides serve a critical role in  
304 innate defenses against pathogens in all insects, including honey bees (67). The effect of AMP  
305 on bacteria and viruses was a key focus of included articles due to the high incidence of  
306 American Foulbrood (a bacterial infection) and Varroa Mite, which normally increase morbidity  
307 in the hive through secondary bacterial and viral infections (19). Therefore, because most articles  
308 investigated morbidity as a result of bacteria and viruses either directly or indirectly, it follows  
309 that AMPs, the primary defense against these organisms, would also be investigated. As shown  
310 in human and livestock animal studies, an increase in disease susceptibility inevitably  
311 corresponds to an increase in antimicrobial drug treatment, with a subsequent increased risk of  
312 AMR (68–70). Although increased antimicrobial usage is commonly inferred to correlate with an  
313 increased risk of AMR, none of the studies in this review investigated this connection. Therefore,  
314 there remains an opportunity to holistically connect evidence streams between disease  
315 susceptibility, treatment requirement, and risk of AMR to determine their interdependencies.

316 Although external antimicrobial treatment by beekeepers was the primary focus of  
317 research included in this review, our study revealed an increased interest in zoopharmacognostic  
318 (self-medicating) behaviours within the hive itself. While normal drug treatment in apiaries  
319 occurs once or twice per year in the spring and fall, self medication processes by honey bees

320 themselves within the hive are continuously implemented (71). Additionally, honey bee self  
321 medication utilizes products within the hive that are prone to variable strength and efficacy,  
322 partly due to outside factors. Our study exposed some contributors to this antimicrobial variance,  
323 namely temperature and seasonality. However, domestication has led to some additional  
324 challenges and considerations, such as the mixing of honey bees and antimicrobial products (e.g.,  
325 honey and propolis) from multiple geographic sources. Given the sensitivity of hive products to  
326 climatic conditions, the relocation of honey bees to new climates and environments may alter the  
327 antimicrobial properties and efficacy of hive products. There is an opportunity to investigate how  
328 the alteration of these products may influence the ability of colonies to appropriately self  
329 medicate. Despite this growing concern, we did not identify any studies that directly correlated  
330 honey bee hive product self medication with an increased threat of AMR. Given that inconsistent  
331 antimicrobial strength can lead to AMR, and environmental conditions have been shown to  
332 contribute to antimicrobial inconsistency both in bees as well as the general population (1,72),  
333 connecting these two areas remains an opportunity for future interdisciplinary research.

334

## 335 **Strengths and Limitations**

336 While all literature reviews face the possibility of failing to capture all eligible articles,  
337 we aimed to minimize this risk by following a rigorous, systematic approach (73). We adopted  
338 a search strategy without language limitations in order to reflect the global breadth of the issues  
339 at hand. However, this global undertaking resulted in the necessary exclusion of 37 articles that  
340 were deemed eligible through abstract screening but were not available to us for full-text review  
341 (S6 Excluded Articles). The novel insights implemented in this study allowed for the  
342 identification of multiple literature gaps and future areas of interdisciplinary research.

## 343 **Conclusions**

344           This study mapped current literature investigating the relationship between AMR and  
345 honey bees in the context of climate change and environmental pollutants through a One Health  
346 lens. We identified considerable potential for further interdisciplinary research to holistically  
347 correlate environmental influences on honey bee immunity, disease susceptibility, and self  
348 medicative behaviours on AMR risk. Despite the agricultural and economic significance of  
349 honey bees globally, we identified a lack of literature on honey bee health in the context of  
350 AMR. Our findings provide the basis for future research to understand the complex linkages of  
351 AMR, climate change, environmental pollution and honey bee health in the context of One  
352 Health. This study will contribute to the growing body of One Health and interdisciplinary  
353 research to find novel solutions for global “wicked” problems beyond the bee hive.

354

## 355 **Acknowledgments**

356           We thank Sandra Campbell from the University of Alberta Library for assistance in  
357 developing the search strategy. We also thank Dr Zvonimir Poljak, Dr Philipp Schott, Dr Okan  
358 Bulut, Giulia Scarpa, Nia King, and Carina de Micheli for translating non-English within this  
359 project.

## 360 **Author contributions**

361 EDJD: conceptualization, data curation, formal analysis, funding acquisition, investigation,  
362 methodology, writing – original draft, writing – review and editing.

363 SLH: conceptualization, funding acquisition, methodology, resources, software, supervision,  
364 writing – review and editing.



365 SSY: conceptualization, funding acquisition, methodology, resources, software, supervision,  
366 writing – review and editing.

367 CJW: conceptualization, funding acquisition, methodology, project administration, writing –  
368 review and editing.

369 CWW: methodology, supervision, writing – review and editing.

370 SG: data curation, formal analysis, investigation, writing – review and editing.

371 SJGO: conceptualization, funding acquisition, methodology, project administration, resources,  
372 supervision, writing – original draft, writing – review and editing.

## 373 **References**

- 374 1. Regueira MS, Tintino SR, da Silva ARP, Costa M do S, Boligon AA, Matias EFF, et al.  
375 Seasonal variation of Brazilian red propolis: Antibacterial activity, synergistic effect and  
376 phytochemical screening. *Food Chem Toxicol.* 2017 Sep;107(Pt B):572–80. Doi:  
377 10.1016/j.fct.2017.03.052
- 378 2. Ueno Y, Yoshida E, Misumi W, Watando E, Suzuki K, Hirai Y, et al. Population structure  
379 and antimicrobial susceptibility of *Paenibacillus larvae* isolates from American foulbrood  
380 cases in *Apis mellifera* in Japan. *Environ Microbiol Rep.* 2018;10(2):210–216. Doi:  
381 10.1111/1758-2229.12623
- 382 3. Ebrahimi A, Lotfalian S. Isolation and antibiotic resistance patterns of *Escherichia coli* and  
383 coagulase positive *Staphylococcus aureus* from the digestive tract of honey bees. *Iran J Vet*  
384 *Res.* 2005;6(2(Ser. 12)):51–97.
- 385 4. James RR, Xu J. Mechanisms by which pesticides affect insect immunity. *J invertebr*  
386 *pathol.* 2011;109(2):175–182. Doi: 10.1016/j.jip.2011.12.005
- 387 5. Travis DA, Sriramarao P, Cardona C, Steer CJ, Kennedy S, Sreevatsan S, et al. One  
388 Medicine One Science: A framework for exploring challenges at the intersection of  
389 animals, humans, and the environment. *Ann N Y Acad Sci.* 2014;1334(1):26–44. Doi:  
390 10.1111/nyas.12601
- 391 6. Bernal J, Martin MT, Toribio L, Martin-Hernandez R, Higes M, Bernal JL, et al.  
392 Determination of tylosins A, B, C and D in bee larvae by liquid chromatography coupled to  
393 ion trap-tandem mass spectrometry. *J Chromatogr B Analyt Technol Biomed Life Sci.*  
394 2011;879(19):1596–1604. Doi: 10.1016/j.jchromb.2011.03.052

- 395 7. Hawthorne DJ, Dively GP, D.J. H, Dively GP, Hawthorne DJ, Dively GP. Killing them  
396 with kindness? in-hive medications may inhibit xenobiotic efflux transporters and endanger  
397 honey bees. PLoS ONE. 2011;6(11):e26796–e26796. Doi: 10.1371/journal.pone.0026796
- 398 8. Guseman AJ, Miller K, Kunkle G, Dively GP, Pettis JS, Evans JD, et al. Multi-drug  
399 resistance transporters and a mechanism-based strategy for assessing risks of pesticide  
400 combinations to honey bees. PLoS ONE. 2016;11(2):e0148242. Doi:  
401 10.1371/journal.pone.0148242
- 402 9. Brandt A, Gorenflo A, Meixner M, Büchler R, Siede R, Meixner M, et al. The  
403 neonicotinoids thiacloprid, imidacloprid, and clothianidin affect the immunocompetence of  
404 honey bees (*Apis mellifera* L.). J insect physiol. 2016;86:40–47. Doi:  
405 10.1016/j.jinsphys.2016.01.001
- 406 10. Brandt A, Grikscheit K, Siede R, Grosse R, Meixner MD, Buechler R, et al.  
407 Immunosuppression in Honeybee Queens by the Neonicotinoids Thiacloprid and  
408 Clothianidin. Sci Rep. 2017;7(1):4673. Doi: 10.1038/s41598-017-04734-1
- 409 11. O’Neal ST, Reeves AM, Fell RD, Brewster CC, Anderson TD, S.T. O, et al. Chlorothalonil  
410 Exposure Alters Virus Susceptibility and Markers of Immunity, Nutrition, and  
411 Development in Honey Bees. J insect sci. 2019;19(3). Doi: 10.1093/jisesa/iez051
- 412 12. Prodelalová J, Malenovská H, Moutelíková R, Titera D. Virucides in apiculture: persistence  
413 of surrogate enterovirus under simulated field conditions. Pest Manag Sci.  
414 2017;73(12):2544–2549. Doi: 10.1002/ps.4653
- 415 13. Ozkirim A, Aktas S, Keskin N. Screening Alternative Antibiotics Against *Paenibacillus*  
416 *Larvae* Subsp *Larvae* Strains Isolated from the Different Regions of Turkey. Mellifera.  
417 2007;7(13–14):2–8.

- 418 14. Alippi AM, Albo GN, Reynaldi FJ, De Giusti MR. In vitro and in vivo susceptibility of the  
419 honeybee bacterial pathogen *Paenibacillus larvae* subsp *larvae* to the antibiotic tylosin. Vet  
420 microbiol. 2005;109(1–2):47–55. Doi: 10.1016/j.vetmic.2005.03.008
- 421 15. Erler S, Moritz RFA. Pharmacophagy and pharmacophory: mechanisms of self-medication  
422 and disease prevention in the honeybee colony (*Apis mellifera*). Apidologie.  
423 2015;47(3):389–411. Doi: 10.1007/s13592-015-0400-z
- 424 16. Chaimanee V, Pettis JS, Chen YP, Evans JD, Khongphinitbunjong K, Chantawannakul P.  
425 Susceptibility of four different honey bee species to *Nosema ceranae*. Vet parasitol.  
426 2013;193(1/3):260–265. Doi: 10.1016/j.vetpar.2012.12.004
- 427 17. Bastos EMAF, Simone M, Macedo Jorge D, Egea Soares AE, Spivak M. In vitro study of  
428 the antimicrobial activity of Brazilian propolis against *Paenibacillus larvae*. J invertebr  
429 pathol. 2007;97(3):273–281. Doi: 10.1016/j.jip.2007.10.007
- 430 18. Krongdang S, Evans JD, Pettis JS, Chantawannakul P. Multilocus sequence typing,  
431 biochemical and antibiotic resistance characterizations reveal diversity of North American  
432 strains of the honey bee pathogen *Paenibacillus larvae*. PLoS ONE. 2017;12(5):e0176831–  
433 e0176831. Doi: 10.1371/journal.pone.0176831
- 434 19. Gregorc A, Evans JD, Scharf M, Ellis JD. Gene expression in honey bee (*Apis mellifera*)  
435 larvae exposed to pesticides and Varroa mites (*Varroa destructor*). J insect physiol.  
436 2012;58(8):1042–1049. Doi: 10.1016/j.jinsphys.2012.03.015
- 437 20. Tian B, Fadhil NH, Powell JE, Kwong WK, Moran NA. Long-term exposure to antibiotics  
438 has caused accumulation of resistance determinants in the gut microbiota of honeybees.  
439 MBio. 2012 Oct 30;3(6). Doi: 10.1128/mBio.00377-12

- 440 21. Loglio G. *Varroa jacobsoni* Oud.: Is it becoming resistant to fluvalinate? *Apicoltore*  
441 *Moderno*. 1993;84(1):7–10.
- 442 21. World Health Organization, editor. *Antimicrobial resistance: global report on surveillance*.  
443 Geneva, Switzerland: World Health Organization; 2014. 232 p.
- 444 22. O’Neill J. *Tackling drug-resistant infections globally: Final report and recommendations*  
445 [Internet]. 2016 [cited 2020 Sep 13]. Available from: [https://amr-](https://amr-review.org/Publications.html)  
446 [review.org/Publications.html](https://amr-review.org/Publications.html)
- 447 23. Government of Canada. *Climate change: Canada’s action, climate future, partnerships,*  
448 *adaptation, health, science, emissions reporting* [Internet]. 2017 [cited 2020 Sep 13].  
449 Available from:  
450 <https://www.canada.ca/en/services/environment/weather/climatechange.html>
- 451 24. IPCC (Intergovernmental Panel on Climate Change). *Climate Change 2013: The Physical*  
452 *Science Basis. Contribution of Working Group I to the Fifth Assessment Report of the*  
453 *Intergovernmental Panel on Climate Change*. [Internet]. Stocker TF, Qin D, Plattner GK, M  
454 Tignor, S K Allen, J Boschung, et al., editors. Cambridge, United Kingdom and New York,  
455 NY, USA: Cambridge University Press; 2013 [cited 2020 Sep 13]. 1535 p. Available from:  
456 <https://www.ipcc.ch/report/ar5/wg1/>
- 457 25. NASA (National Aeronautics and Space Administration). *Climate Change: Vital Signs of*  
458 *the Planet* [Internet]. *Climate Change: Vital Signs of the Planet*. 2019 [cited 2020 Sep 13].  
459 Available from: <https://climate.nasa.gov/>
- 460 26. United Nations. *Climate Change* [Internet]. 2016 [cited 2019 Sep 13]. Available from:  
461 <https://www.un.org/en/sections/issues-depth/climate-change/>

- 462 27. Holm P, Goodsite ME, Cloetingh S, Agnoletti M, Moldan B, Lang DJ, et al. Collaboration  
463 between the natural, social and human sciences in Global Change Research. *Environ Sci*  
464 *Policy*. 2013 Apr 1;28:25–35. Doi: 10.1016/j.envsci.2012.11.010
- 465 28. Van Noorden R. Interdisciplinary research by the numbers. *Nature*. 2015 Sep  
466 17;525(7569):306–7. Doi: 10.1038/525306a
- 467 29. Landrigan PJ, Fuller R, Acosta NJR, Adeyi O, Arnold R, Basu N (Nil), et al. The Lancet  
468 Commission on pollution and health. *The Lancet*. 2017 Oct 19;391(10119):462–512. Doi:  
469 10.1016/S0140-6736(17)32345-0
- 470 30. Masson-Delmotte V, Zhai P, Pörtner H-O, Roberts D, Skea J, Shukla PR, et al., editors.  
471 *Global Warming of 1.5°C. An IPCC Special Report on the impacts of global warming of*  
472 *1.5°C above pre-industrial levels and related global greenhouse gas emission pathways, in*  
473 *the context of strengthening the global response to the threat of climate change, sustainable*  
474 *development, and efforts to eradicate poverty*. 2018 [cited 2020 Sep 13]; Available from:  
475 <https://www.ipcc.ch/sr15/>
- 476 31. Pörtner H-O, Roberts DC, Masson-Delmotte V, Zhai P, Tignor M, Poloczanska E, et al.,  
477 editors. *IPCC Special Report on the Ocean and Cryosphere in a Changing Climate*. 2019  
478 [cited 2020 Sep 13]; Available from: <https://www.ipcc.ch/srocc/>
- 479 32. Shukla PR, Skea J, Buendia EC, Masson-Delmotte V, Pörtner H-O, Roberts DC, et al.,  
480 editors. *Climate Change and Land: an IPCC special report on climate change,*  
481 *desertification, land degradation, sustainable land management, food security, and*  
482 *greenhouse gas fluxes in terrestrial ecosystems*. 2019 [cited 2020 Sep 13]; Available from:  
483 <https://www.ipcc.ch/srcl/>

- 484 33. Lyall C, Fletcher I. Experiments in interdisciplinary capacity-building: The successes and  
485 challenges of large-scale interdisciplinary investments. *Sci Public Policy*. 2013  
486 Feb;40(1):1–7. Doi: 10.1093/scipol/scs113
- 487 34. Olsen DS, Borlaug SB, Klitkou A, Lyall C, Yearley S. A Better understanding of  
488 Interdisciplinary research in Climate Change. *Clim Change*. 2013;28.
- 489 35. World Health Organization. One Health [Internet]. WHO. 2017 [cited 2020 Sep 13].  
490 Available from: <http://www.who.int/features/qa/one-health/en/>
- 491 36. Conti ME, Botrè F. Honeybees and Their Products as Potential Bioindicators of Heavy  
492 Metals Contamination. *Environ Monit Assess*. 2001 Jul 1;69(3):267–82. Doi:  
493 10.1023/A:1010719107006
- 494 37. Porrini C, Sabatini A, Girotti S, Ghini S, Medrzycki P, Grillenzoni F, et al. Honey bees and  
495 bee products as monitors of the environmental contamination. *APIACTA*. 2003 Jan  
496 1;38:63–70.
- 497 38. Mullin CA, Frazier M, Frazier JL, Ashcraft S, Simonds R, vanEngelsdorp D, et al. High  
498 Levels of Miticides and Agrochemicals in North American Apiaries: Implications for  
499 Honey Bee Health. *PLoS ONE*. 2010 Mar 19;5(3):e9754. Doi:  
500 10.1371/journal.pone.0009754
- 501 39. Smart M, Pettis J, Rice N, Browning Z, Spivak M. Linking Measures of Colony and  
502 Individual Honey Bee Health to Survival among Apiaries Exposed to Varying Agricultural  
503 Land Use. *PLoS ONE*. 2016 Mar 30;11(3):e0152685. Doi: 10.1371/journal.pone.0152685
- 504 40. Proďelalov J, Malenovsk H, Moutelkov R, Titra D. Virucides in apiculture: persistence  
505 of surrogate enterovirus under simulated field conditions. *Pest Manag Sci*. 2017  
506 Dec;73(12):2544–9. Doi: 10.1002/ps.4653

- 507 41. Runckel C, Flenniken ML, Engel JC, Ruby JG, Ganem D, Andino R, et al. Temporal  
508 Analysis of the Honey Bee Microbiome Reveals Four Novel Viruses and Seasonal  
509 Prevalence of Known Viruses, *Nosema*, and *Crithidia*. PLoS ONE. 2011 Jun 7;6(6):e20656.  
510 Doi: 10.1371/journal.pone.0020656
- 511 42. Bee Informed Partnership. Loss & Management Survey [Internet]. 2020 [cited 2020 Sep  
512 13]. Available from: <https://beeinformed.org/citizen-science/loss-and-management-survey/>
- 513 43. COLOSS. Honey Bee Research Association: Colony losses monitoring [Internet]. COLOSS.  
514 2019 [cited 2020 Sep 13]. Available from: [https://coloss.org/core-projects/colony-losses-](https://coloss.org/core-projects/colony-losses-monitoring/)  
515 [monitoring/](https://coloss.org/core-projects/colony-losses-monitoring/)
- 516 44. Cox-Foster D, vanEngelsdorp D. Solving the Mystery of the Vanishing Bees. Scientific  
517 American. 2009 Apr;300(4):40–7.
- 518 45. vanEngelsdorp D, Meixner MD. A historical review of managed honey bee populations in  
519 Europe and the United States and the factors that may affect them. J Invertebr Pathol. 2010  
520 Jan;103:S80–95. Doi: 10.1016/j.jip.2009.06.011
- 521 46. Arksey H, O’Malley L. Scoping studies: towards a methodological framework. Int J Soc  
522 Res Methodol. 2005 Feb 1;8(1):19–32. Doi: 10.1080/1364557032000119616
- 523 47. Levac D, Colquhoun H, O’Brien KK. Scoping studies: advancing the methodology.  
524 Implement Sci. 2010 Sep 20;5(1):69. Doi: 10.1186/1748-5908-5-69
- 525 48. McInnes MDF, Moher D, Thombs BD, McGrath TA, Bossuyt PM, Clifford T, et al.  
526 Preferred Reporting Items for a Systematic Review and Meta-analysis of Diagnostic Test  
527 Accuracy Studies: The PRISMA-DTA Statement. JAMA. 2018 Jan 23;319(4):388–96. Doi:  
528 10.1001/jama.2017.19163



- 529 49. Peters M, Godfrey C, Khalil H, Mcinerney P, Parker D, Baldini Soares C. Guidance for  
530 conducting systematic scoping reviews. *Int J Evid Based Healthc*. 2015 Jul 1;13. Doi:  
531 10.1097/XEB.0000000000000050
- 532 50. Peters M, Godfrey C, Mcinerney P, Baldini Soares C, Khalil H, Parker D. Chapter 11:  
533 Scoping Reviews [Internet]. 2017 [cited 2020 Sep 13]. Available from:  
534 <https://wiki.joannabriggs.org/display/MANUAL/Chapter+11%3A+Scoping+reviews>
- 535 51. Tricco AC, Lillie E, Zarin W, O'Brien KK, Colquhoun H, Levac D, et al. PRISMA  
536 Extension for Scoping Reviews (PRISMA-ScR): Checklist and Explanation. *Ann Intern*  
537 *Med*. 2018 Oct 2;169(7):467–73. Doi: 10.7326/M18-0850
- 538 52. World Health Organization. Antimicrobial resistance [Internet]. WHO. 2019 [cited 2020  
539 Sep 13]. Available from: <http://www.who.int/antimicrobial-resistance/en/>
- 540 53. United Nations Framework Convention on Climate Change. Fact sheet: Climate change  
541 science - the status of climate change science today. 2011 Feb;7.
- 542 54. United Nations. World Economic Situation and Prospects 2014 [Internet]. 2014 [cited 2020  
543 Sep 13]. Available from:  
544 [https://www.un.org/en/development/desa/policy/wesp/wesp\\_current/2014wesp\\_country\\_classification.pdf](https://www.un.org/en/development/desa/policy/wesp/wesp_current/2014wesp_country_classification.pdf)
- 545
- 546 55. Wales AD, Davies RH. Co-Selection of Resistance to Antibiotics, Biocides and Heavy  
547 Metals, and Its Relevance to Foodborne Pathogens. *Antibiotics*. 2015 Dec;4(4):567–604.  
548 Doi: 10.3390/antibiotics4040567
- 549 56. Martin SJ, Highfield AC, Brettell L, Villalobos EM, Budge GE, Powell M, et al. Global  
550 Honey Bee Viral Landscape Altered by a Parasitic Mite. *Science*. 2012 Jun  
551 8;336(6086):1304–6. Doi: 10.1126/science.1220941

- 552 57. Baron SA, Diene SM, Rolain J-M. Human microbiomes and antibiotic resistance. Hum  
553 Microbiome J. 2018 Dec 1;10:43–52. Doi: 10.1016/j.humic.2018.08.005
- 554 58. von Wintersdorff CJH, Penders J, van Niekerk JM, Mills ND, Majumder S, van Alphen LB,  
555 et al. Dissemination of Antimicrobial Resistance in Microbial Ecosystems through  
556 Horizontal Gene Transfer. Front Microbiol. 2016 Feb 19;7. Doi: 10.3389/fmicb.2016.00173
- 557 59. Burnham AJ. Scientific Advances in Controlling *Nosema ceranae* (*Microsporidia*)  
558 Infections in Honey Bees (*Apis mellifera*). Front Vet Sci. 2019 Mar 15;6. Doi:  
559 10.3389/fvets.2019.00079
- 560 60. Jensen AB, Aronstein K, Flores JM, Vojvodic S, Palacio MA, Spivak M. Standard methods  
561 for fungal brood disease research. J Apic Res. 2013 Jan 22;52(1). Doi:  
562 10.3896/IBRA.1.52.1.13
- 563 61. Moldovan A, Fraunholz MJ. In or out: Phagosomal escape of *Staphylococcus aureus*. Cell  
564 Microbiol. 2019;21(3):e12997. Doi: 10.1111/cmi.12997
- 565 62. Tuchscher L, Medina E, Hussain M, Völker W, Heitmann V, Niemann S, et al.  
566 *Staphylococcus aureus* phenotype switching: an effective bacterial strategy to escape host  
567 immune response and establish a chronic infection. EMBO Mol Med. 2011;3(3):129–41.  
568 Doi: 10.1002/emmm.201000115
- 569 63. Raymann K, Shaffer Z, Moran NA. Antibiotic exposure perturbs the gut microbiota and  
570 elevates mortality in honeybees. PLoS Biology. 2017 Mar 14;15(3):1–22. Doi:  
571 10.1371/journal.pbio.2001861
- 572 64. Handel A, Margolis E, Levin BR. Exploring the role of the immune response in preventing  
573 antibiotic resistance. J Theor Biol. 2009 Feb 21;256(4):655–62. Doi:  
574 10.1016/j.jtbi.2008.10.025

- 575 65. Margolis E, Rosch JW. Fitness Landscape of the Immune Compromised Favors the  
576 Emergence of Antibiotic Resistance. *ACS Infect Dis*. 2018 Sep 14;4(9):1275–7. Doi:  
577 10.1021/acsinfecdis.8b00158
- 578 66. Wu Q, Patočka J, Kuča K. Insect Antimicrobial Peptides, a Mini Review. *Toxins (Basel)*.  
579 2018 Nov 8;10(11). Doi: 10.3390/toxins10110461
- 580 67. CCA (Council of Canadian Academies). When Antibiotics Fail: The Expert Panel on the  
581 Potential Socio-Economic Impacts of Antimicrobial Resistance in Canada [Internet]. 2019  
582 [cited 2020 Sep 13]. Available from: [https://cca-reports.ca/reports/the-potential-socio-](https://cca-reports.ca/reports/the-potential-socio-economic-impacts-of-antimicrobial-resistance-in-canada/)  
583 [economic-impacts-of-antimicrobial-resistance-in-canada/](https://cca-reports.ca/reports/the-potential-socio-economic-impacts-of-antimicrobial-resistance-in-canada/)
- 584 68. Manyi-Loh C, Mamphweli S, Meyer E, Okoh A. Antibiotic Use in Agriculture and Its  
585 Consequential Resistance in Environmental Sources: Potential Public Health Implications.  
586 *Molecules*. 2018 Mar 30;23(4). Doi: 10.3390/molecules23040795
- 587 69. Public Health Agency of Canada. Tackling Antimicrobial Resistance and Antimicrobial  
588 Use: A Pan-Canadian Framework for Action [Internet]. 2017 [cited 2020 Sep 13].  
589 Available from: [https://www.canada.ca/en/health-canada/services/publications/drugs-](https://www.canada.ca/en/health-canada/services/publications/drugs-health-products/tackling-antimicrobial-resistance-use-pan-canadian-framework-action.html)  
590 [health-products/tackling-antimicrobial-resistance-use-pan-canadian-framework-action.html](https://www.canada.ca/en/health-canada/services/publications/drugs-health-products/tackling-antimicrobial-resistance-use-pan-canadian-framework-action.html)
- 591 70. Simone-Finstrom M, Spivak M. Propolis and bee health: the natural history and  
592 significance of resin use by honey bees. *Apidologie*. 2010 May 1;41(3):295–311. Doi:  
593 10.1051/apido/2010016
- 594 71. Kaba HEJ, Kuhlmann E, Scheithauer S. Thinking outside the box: Association of  
595 antimicrobial resistance with climate warming in Europe – A 30 country observational  
596 study. *Int J Hyg Environ Health*. 2020 Jan 1;223(1):151–8. Doi:  
597 10.1016/j.ijheh.2019.09.008

598 72. Pham MT, Rajić A, Greig JD, Sargeant JM, Papadopoulos A, McEwen SA. A scoping  
599 review of scoping reviews: advancing the approach and enhancing the consistency. Res  
600 Synth Methods. 2014 Dec;5(4):371–85. Doi: 10.1002/jrsm.1123

601

## 602 **Supporting information**

603 **S1 Protocol.** Protocol outlining the systematic scoping review created using JBI guidelines and  
604 following the PRISMA-ScR checklist – time-stamped on December 19, 2019.

605 **S2 PRISMA-ScR Checklist.** Completed checklist.

606 **S3 Search Strings.** Complete search strings for all databases searched in this scoping review.

607 **S4 Table.** Screening questions that define the inclusion and exclusion criteria used in the two-  
608 level screening process by two independent reviewers.

609 **S5 Table.** Data extraction table of complete study characteristics of included articles.

610 **S6 Excluded Articles.** List of papers excluded due to the inability to obtain full-text documents.

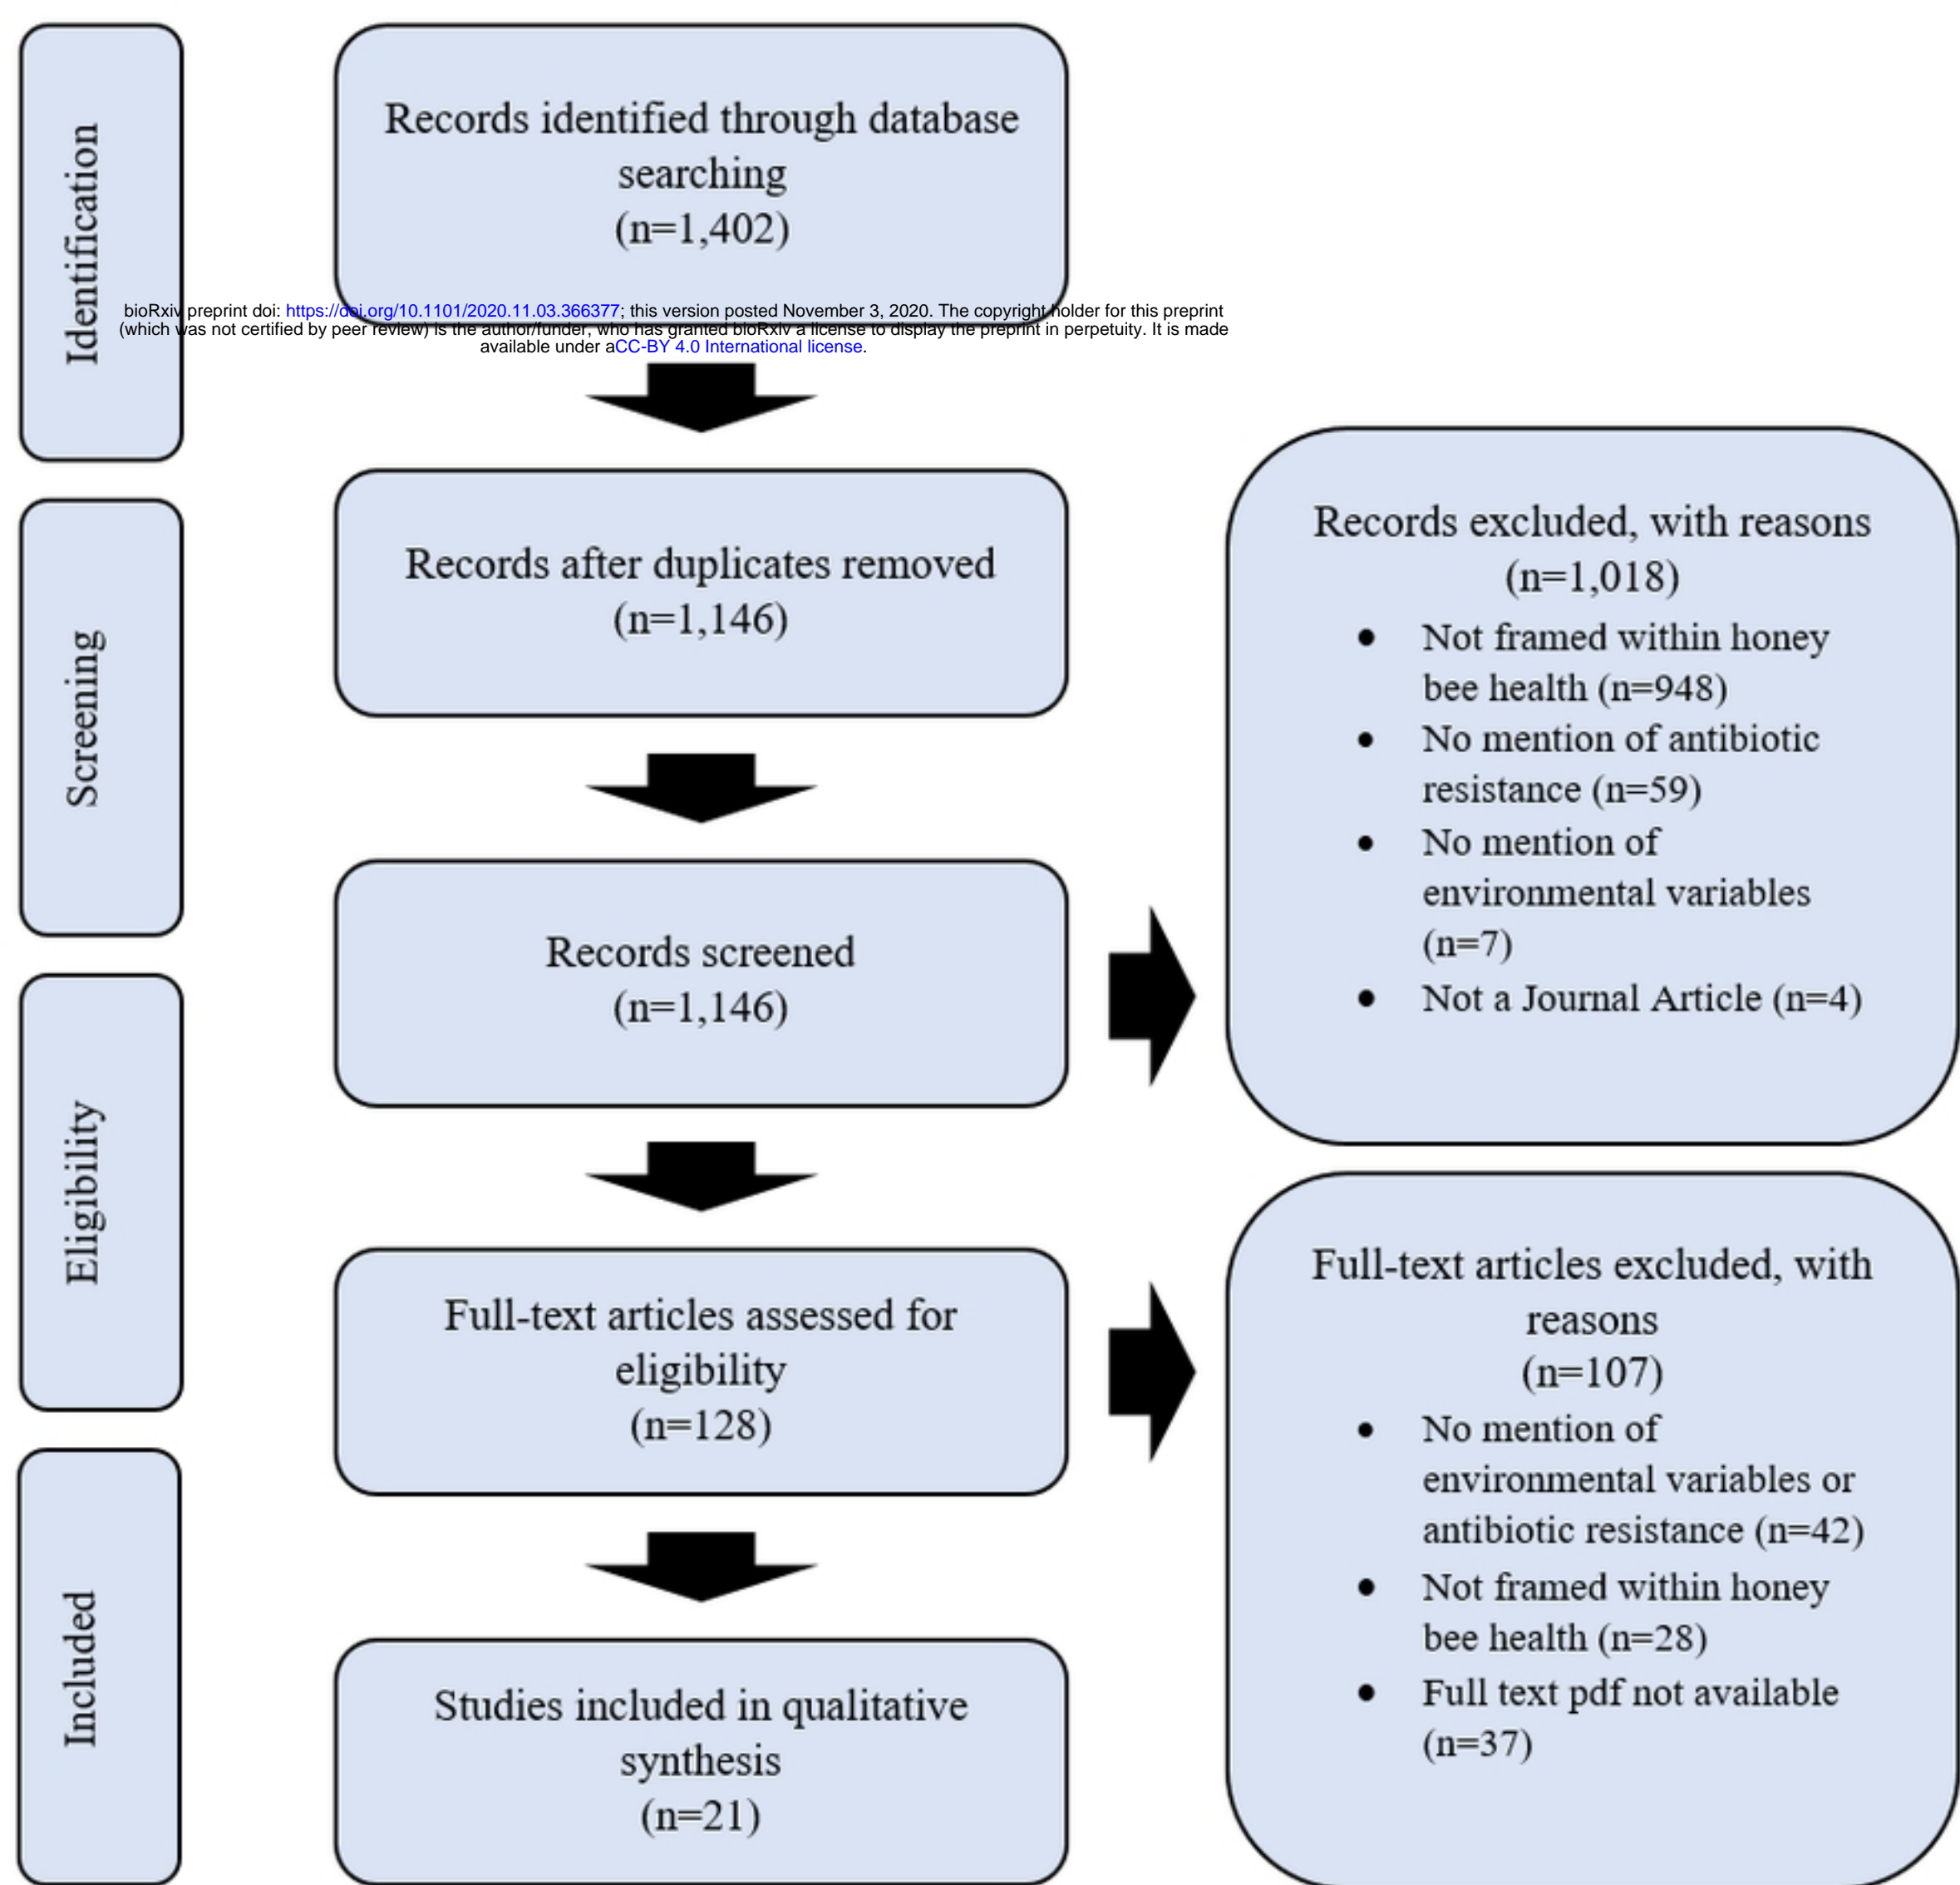

Figure 1

Number  
of Articles

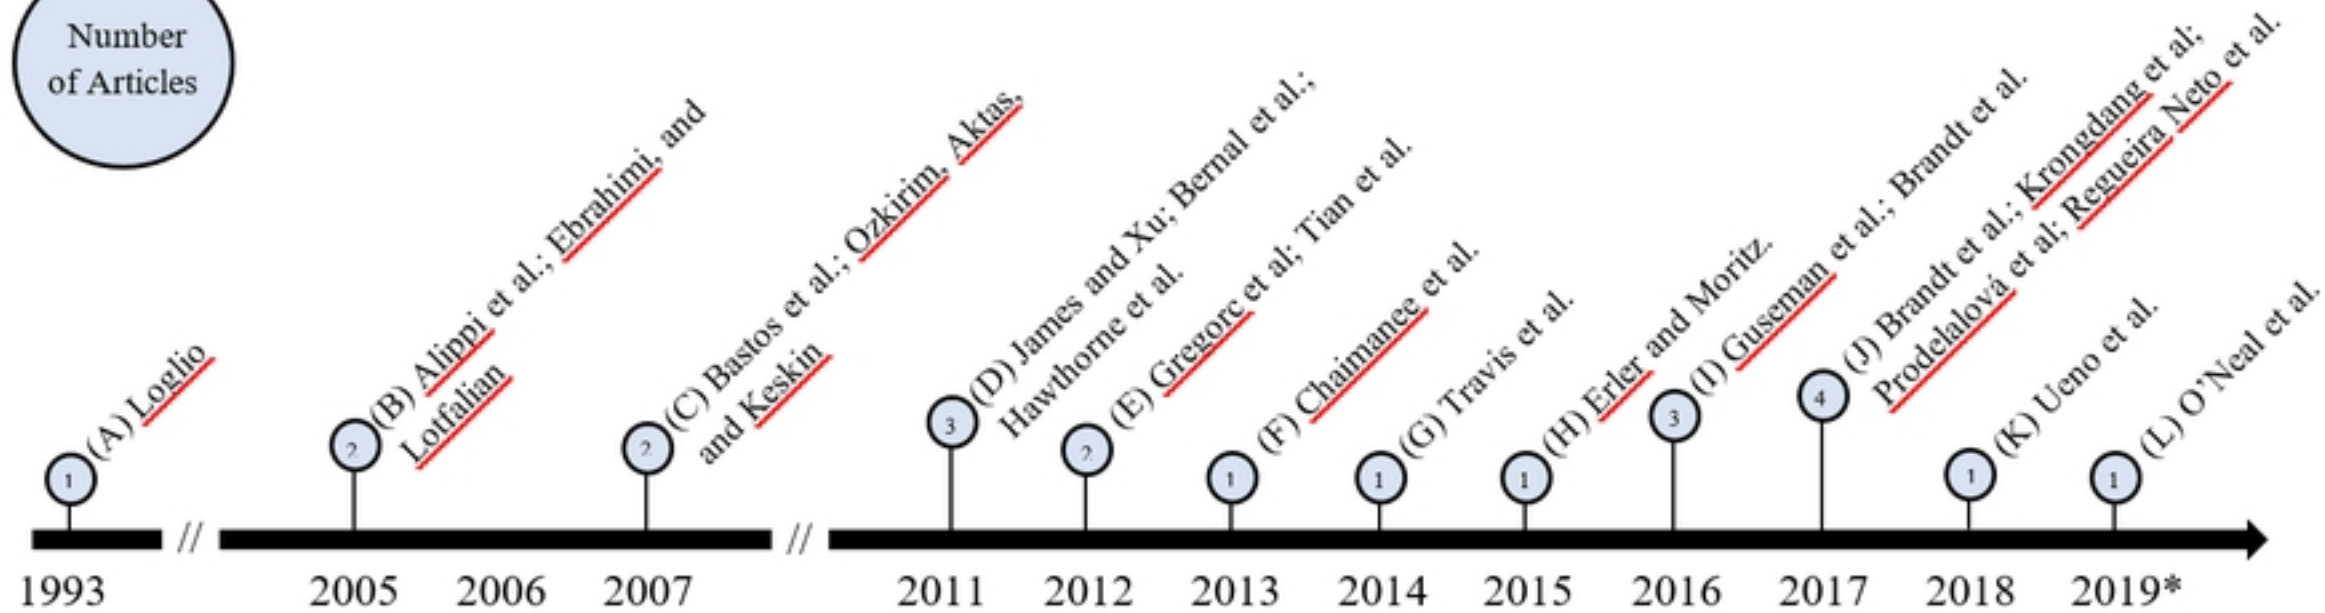

Figure 2

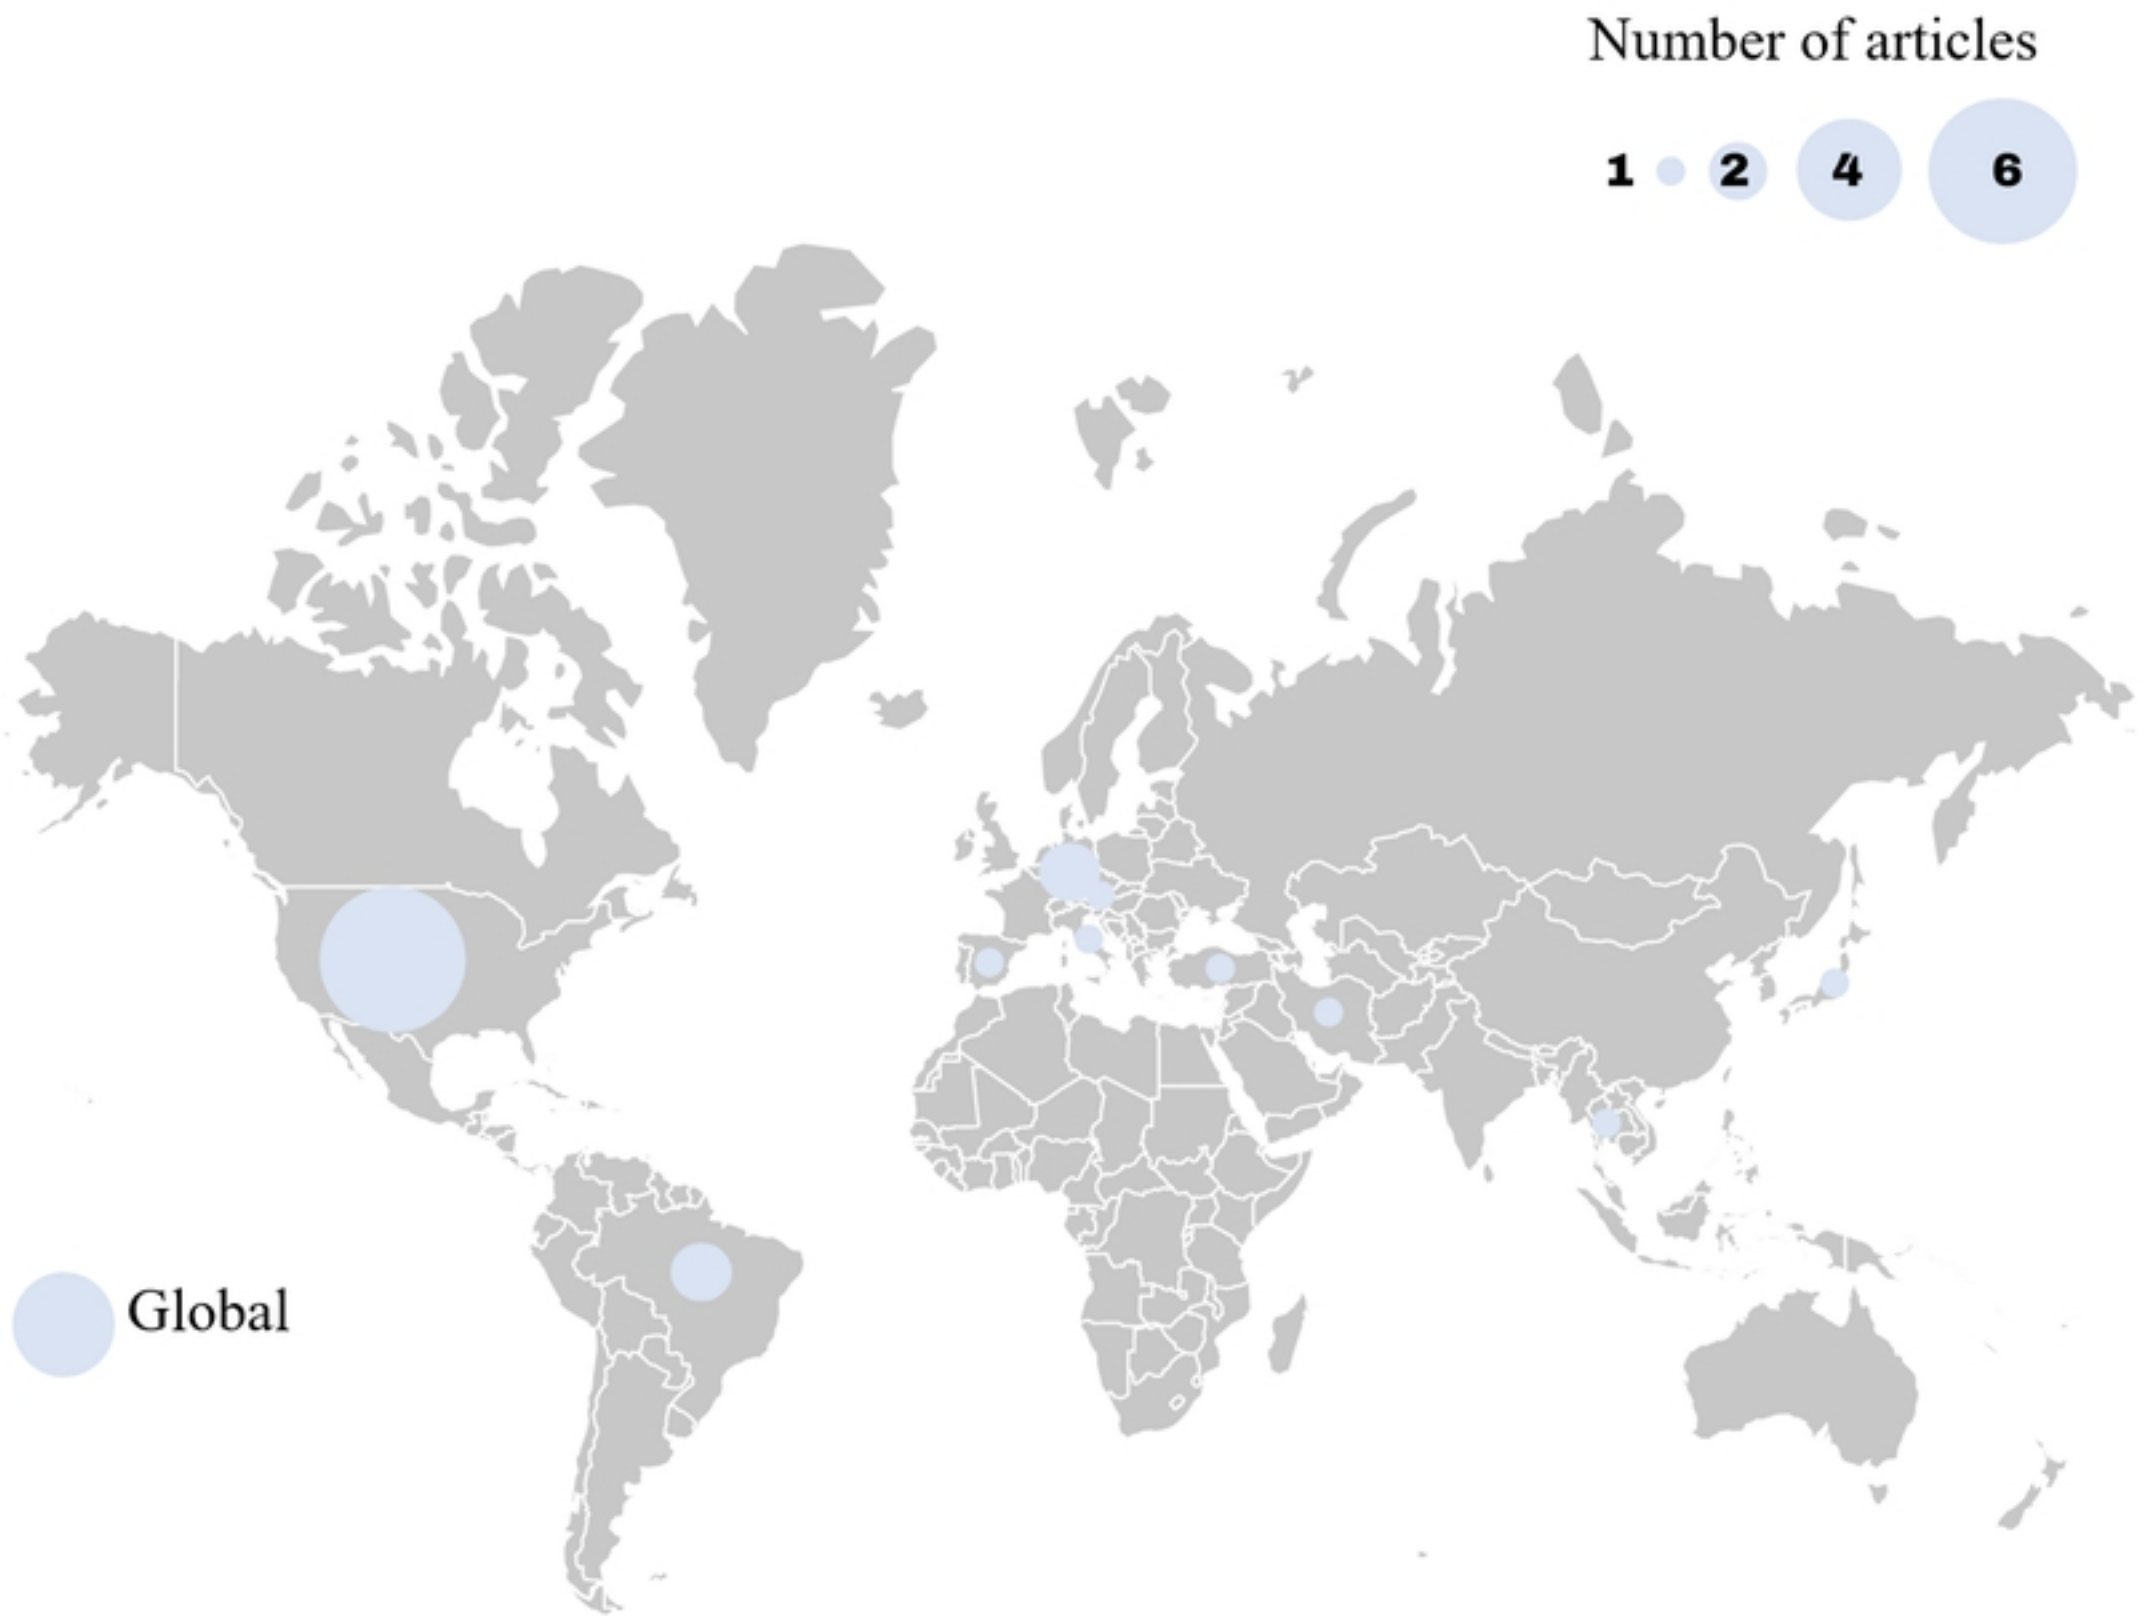

Figure 3
